# Supplementary material for: Renal Cell Carcinoma Health Disparities in Stage and Mortality among American Indians/Alaska Natives and Hispanic Americans: Comparison of National Cancer Database and Arizona Cancer Registry Data
Source: PubMed Central journal article supplement (PMC7956712; doi:10.3390/cancers13050990), 2021-02-27
Supplement: cancers-13-00990-s001.pdf [file cancers-13-00990-s001.pdf]

## Supplementary Materials

# Renal Cell Carcinoma Health Disparities in Stage and Mortality among American Indians/Alaska Natives and Hispanic Americans: Comparison of National Cancer Database and Arizona Cancer Registry Data

Celina I. Valencia, Samer Asmar, Chiu-Hsieh Hsu, Francine C. Gachupin, Ava C. Wong, Juan Chipollini, Benjamin R. Lee and Ken Batai

## Supplementary Methods

Separate analyses for American Indians/Alaska Natives (AIs/ANs) and Mexican Americans were performed in each dataset, National Cancer Database (NCDB) and Arizona Cancer Registry (ACR) to identify specific factors associated with advanced-stage renal cell carcinoma (RCC). For each dataset and each racial/ethnic group, bivariate logistic regression was performed for each variable, including patients' demographic, neighborhood characteristics, residence pattern, and health care access factors. Variables that were significantly associated with advanced-stage RCC were included in the adjusted model. For Arizona ACR, percent Native language (<4% vs. ≥4%) and percent Spanish language (<10%, ≥10%, <25%, ≥25%, <50%, or ≥50%) use were obtained from Arizona United States census data to assess if patients from neighborhood with high Native or Spanish language use have more disadvantage. For AIs/ANs in Arizona, percent high school graduation rate was categorized into two (≥70% vs. <70%), since not many AIs/ANs patients came from neighborhood with ≥90% high school graduation rate.

**Table S1.** Characteristics of patients across racial/ethnic groups in NCDB ( $n = 405,073$ ).

| Characteristics | NHW<br>( $n = 302,230$ ) | AI/AN<br>( $n = 1811$ ) | NHB<br>( $n = 45,334$ ) | AsianA<br>( $n = 6390$ ) | HA                         |                                   |                               |                        |                                                |                            |
|-----------------|--------------------------|-------------------------|-------------------------|--------------------------|----------------------------|-----------------------------------|-------------------------------|------------------------|------------------------------------------------|----------------------------|
|                 |                          |                         |                         |                          | All HA<br>( $n = 49,308$ ) | Mexican/Chicano<br>( $n = 3745$ ) | Puerto Rican<br>( $n = 866$ ) | Cuban<br>( $n = 798$ ) | South or Central<br>American<br>( $n = 1464$ ) | Dominican<br>( $n = 269$ ) |
| Age, mean (SD)  | 63.2 (12.7)              | 58.5 (12.1)             | 60.4 (12.4)             | 61.4 (13.6)              | 60.4 (13.4)                | 59.0 (13.2)                       | 60.0 (13.2)                   | 63.6 (12.7)            | 58.3 (13.0)                                    | 60.4 (14.0)                |
| Gender, $n$ (%) |                          |                         |                         |                          |                            |                                   |                               |                        |                                                |                            |
| Male            | 190,841 (63.1)           | 1039 (57.4)             | 26,776 (59.1)           | 4175 (65.3)              | 29,785 (60.4)              | 2264 (60.5)                       | 505 (58.3)                    | 518 (64.9)             | 875 (59.8)                                     | 164 (61.0)                 |
| Female          | 111,389 (36.9)           | 772 (42.6)              | 18,558 (40.9)           | 2215 (34.7)              | 19,523 (39.6)              | 1481 (39.5)                       | 361 (41.7)                    | 280 (35.1)             | 589 (40.2)                                     | 105 (39.0)                 |
| Grade, $n$ (%)  |                          |                         |                         |                          |                            |                                   |                               |                        |                                                |                            |
| 1&2             | 140,469 (64.7)           | 920 (68.8)              | 19,878 (65.6)           | 2808 (62.5)              | 23,957 (67.4)              | 1683 (64.6)                       | 403 (67.2)                    | 355 (67.1)             | 711 (69.0)                                     | 108 (65.9)                 |
| 3&4             | 76,664 (35.3)            | 417 (31.2)              | 10,410 (34.4)           | 1682 (37.5)              | 11,569 (32.6)              | 922 (35.4)                        | 197 (32.8)                    | 174 (32.9)             | 320 (31.0)                                     | 56 (34.1)                  |
| Stage, $n$ (%)  |                          |                         |                         |                          |                            |                                   |                               |                        |                                                |                            |
| I&II            | 201,416 (72.3)           | 1153 (68.5)             | 32,897 (79.4)           | 4275 (72.1)              | 32,559 (71.7)              | 2295 (65.9)                       | 596 (73.1)                    | 516 (68.3)             | 975 (70.8)                                     | 188 (72.6)                 |
| III&IV          | 77,325 (27.7)            | 529 (31.5)              | 8559 (20.6)             | 1656 (27.9)              | 12,832 (28.6)              | 1187 (34.1)                       | 219 (26.9)                    | 240 (31.7)             | 402 (29.2)                                     | 71 (27.4)                  |

Patients from other racial/ethnic groups and unknown race/ethnicity are not shown. Among HAs, patients with known national/geographic origin were shown on the table. Patients with unknown RCC histological subtype were not included.

<sup>a</sup> Not Otherwise Specified (NOS).

**Table S2.** Characteristics of non-Hispanic Whites, American Indian/Alaska Native, and Hispanic Americans in ACR ( $n = 9337$ ).

| Characteristic  | NHW<br>( $n = 6965$ ) | AI/AN<br>( $n = 632$ ) | HA                    |                                   |                                           |                                               |
|-----------------|-----------------------|------------------------|-----------------------|-----------------------------------|-------------------------------------------|-----------------------------------------------|
|                 |                       |                        | All HA ( $n = 1740$ ) | Mexican American<br>( $n = 739$ ) | US-Born Mexican American<br>( $n = 335$ ) | Mexico-Born Mexican American<br>( $n = 238$ ) |
| Age, mean (SD)  | 64.3 (12.6)           | 58.9 (12.9)            | 59.3 (13.2)           | 62.0 (13.2)                       | 63.5 (13.5)                               | 61.7 (12.3)                                   |
| Gender, $n$ (%) |                       |                        |                       |                                   |                                           |                                               |
| Male            | 4525 (65.0)           | 401 (63.4)             | 1052 (60.5)           | 464 (62.8)                        | 228 (68.1)                                | 141 (59.2)                                    |
| Female          | 2440 (35.0)           | 231 (36.6)             | 688 (39.5)            | 275 (37.2)                        | 107 (31.9)                                | 97 (40.8)                                     |
| Grade, $n$ (%)  |                       |                        |                       |                                   |                                           |                                               |
| 1&2             | 3170 (64.9)           | 211 (70.6)             | 816 (67.0)            | 211 (59.8)                        | 116 (58.3)                                | 95 (61.7)                                     |
| 3&4             | 1714 (35.1)           | 88 (29.4)              | 402 (33.0)            | 142 (40.2)                        | 83 (41.7)                                 | 59 (38.3)                                     |
| Stage, $n$ (%)  |                       |                        |                       |                                   |                                           |                                               |
| I&II            | 4174 (73.6)           | 345 (68.5)             | 959 (70.8)            | 246 (52.8)                        | 138 (50.9)                                | 108 (55.4)                                    |
| III&IV          | 1497 (26.4)           | 163 (31.5)             | 495 (29.2)            | 220 (47.2)                        | 133 (49.1)                                | 87 (44.6)                                     |

Patients from other racial/ethnic groups and unknown race/ethnicity are not shown.

**Table S3.** Factors associated with advanced-stage in American Indians/Alaskan Natives in NCDB ( $n = 1811$ ).

| Characteristics                        | $n$          | Unadjusted       | $p$    | Adjusted          | $p$    |
|----------------------------------------|--------------|------------------|--------|-------------------|--------|
|                                        |              | OR (95% C.I.)    |        | OR (95% C.I.)     |        |
| Age                                    |              |                  | <0.001 |                   | <0.001 |
| 18–49                                  | 419 (23.1)   | Reference        |        | Reference         |        |
| 50–59                                  | 533 (29.4)   | 2.11 (1.55–2.88) |        | 2.18 (1.46–3.26)  |        |
| 60–69                                  | 502 (27.7)   | 2.21 (1.61–3.02) |        | 2.41 (1.61–3.62)  |        |
| 70–79                                  | 294 (16.2)   | 2.31 (1.63–3.28) |        | 2.86 (1.81–4.53)  |        |
| 80 or older                            | 63 (3.5)     | 2.35 (1.27–4.25) |        | 1.75 (0.64–4.79)  |        |
| Gender                                 |              |                  | 0.001  |                   |        |
| Male                                   | 1039 (57.4)  | Reference        |        | Reference         | 0.002  |
| Female                                 | 772 (42.6)   | 0.69 (0.56–0.85) |        | 0.64 (0.48–0.84)  |        |
| Histologic Subtype                     |              |                  | <0.001 |                   | <0.001 |
| Clear Cell                             | 1077 (86.3)  | Reference        |        | Reference         |        |
| Papillary                              | 68 (5.4)     | 0.63 (0.33–1.19) |        | 0.53 (0.26–1.07)  |        |
| Chromophobe                            | 41 (3.3)     | 0.63 (0.28–1.46) |        | 0.68 (0.29–1.60)  |        |
| Others                                 | 62 (5.0)     | 3.02 (1.76–5.17) |        | 2.94 (1.68–5.17)  |        |
| Facility Type                          |              |                  | 0.14   |                   |        |
| Comprehensive Community Cancer Program | 774 (45.5)   | Reference        |        |                   |        |
| Community Cancer Program               | 214 (12.6)   | 1.31 (0.95–1.83) |        |                   |        |
| Integrated Network Cancer Program      | 105 (6.2)    | 0.89 (0.56–1.40) |        |                   |        |
| Academic/Research Program              | 607 (35.7)   | 1.23 (0.98–1.56) |        |                   |        |
| Insurance Type                         |              |                  | 0.28   |                   |        |
| Private                                | 559 (30.9)   | Reference        |        |                   |        |
| Public (Medicare/Medicaid/Others)      | 1113 (61.5)  | 1.14 (0.90–1.43) |        |                   |        |
| Not insured                            | 65 (3.6)     | 1.24 (0.70–2.20) |        |                   |        |
| Not known                              | 74 (4.1)     | 1.64 (0.97–2.77) |        |                   |        |
| Metro, urban vs. rural area            |              |                  | 0.10   |                   | 0.14   |
| Metro                                  | 867 (48.7)   | Reference        |        | Reference         |        |
| Urban                                  | 737 (41.4)   | 1.28 (1.02–1.59) |        | 1.04 (0.76–1.43)  |        |
| Rural                                  | 176 (9.9)    | 1.15 (0.80–1.65) |        | 0.70 (0.41–1.21)  |        |
| Great Circle Distance, mean (SD)       | 82.2 (160.3) | 1.01 (1.00–1.02) | 0.02   | 1.01 (1.003–1.02) | 0.008  |
| Median Income                          |              |                  | 0.03   |                   | 0.72   |
| <\$38,000                              | 799 (44.6)   | Reference        |        | Reference         |        |
| \$38,000–\$47,999                      | 460 (25.7)   | 0.75 (0.58–0.97) |        | 0.98 (0.68–1.39)  |        |
| \$48,000–\$62,999                      | 347 (19.4)   | 0.80 (0.60–1.06) |        | 0.81 (0.52–1.28)  |        |
| \$63,000+                              | 185 (10.3)   | 0.63 (0.44–0.92) |        | 0.73 (0.38–1.39)  |        |
| % no high school degree $\geq 21\%$    | 594 (33.1)   | References       | 0.03   | Reference         |        |

|                     |             |                  |                  |
|---------------------|-------------|------------------|------------------|
| 13.0–20.9%          | 573 (32.0)  | 0.73 (0.57–0.94) | 0.89 (0.63–1.25) |
| 7.0–12.9%           | 447 (24.9)  | 0.72 (0.54–0.94) | 0.80 (0.53–1.22) |
| <7.0%               | 179 (10.0)  | 0.67 (0.45–0.98) | 1.14 (0.59–2.18) |
| Charlson/Deyo Score |             |                  | 0.87             |
| 0                   | 1139 (62.9) | Reference        |                  |
| 1                   | 469 (25.9)  | 0.96 (0.76–1.23) |                  |
| 2                   | 203 (11.2)  | 0.92 (0.66–1.28) |                  |
| Diagnosis Year      |             |                  | 0.03             |
| 2004–2006           | 258 (14.2)  | Reference        | Reference        |
| 2007–2009           | 414 (22.9)  | 0.65 (0.46–0.91) | 0.82 (0.50–1.37) |
| 2010–2012           | 515 (28.4)  | 0.66 (0.42–0.91) | 0.85 (0.53–1.38) |
| 2013–2015           | 624 (34.5)  | 0.63 (0.45–0.86) | 0.78 (0.49–1.24) |

**Table S4.** Factors associated with advanced-stage in Mexican Americans in NCDB ( $n = 3745$ ).

| Characteristics                        | <i>n</i>    | Unadjusted       | Adjusted |                  |          |
|----------------------------------------|-------------|------------------|----------|------------------|----------|
|                                        |             | OR (95% C.I.)    | <i>p</i> | OR (95% C.I.)    | <i>p</i> |
| Age                                    |             |                  | <0.001   |                  | 0.03     |
| 18–49                                  | 897 (24.0)  | Reference        |          | Reference        |          |
| 50–59                                  | 1014 (27.1) | 1.50 (1.22–1.83) |          | 1.20 (0.90–1.61) |          |
| 60–69                                  | 978 (26.1)  | 1.71 (1.40–2.10) |          | 1.53 (1.15–2.05) |          |
| 70–79                                  | 630 (16.8)  | 1.76 (1.40–2.21) |          | 1.57 (1.13–2.20) |          |
| 80 or older                            | 226 (6.0)   | 1.52 (1.09–2.11) |          | 1.32 (0.79–2.19) |          |
| Gender                                 |             |                  | <0.001   |                  | <0.001   |
| Male                                   | 2264 (60.5) | Reference        |          | Reference        |          |
| Female                                 | 1481 (39.5) | 0.74 (0.64–0.85) |          | 0.69 (0.57–0.84) |          |
| Histologic Subtype                     |             |                  | <0.001   |                  | <0.001   |
| Clear Cell                             | 2126 (83.5) | Reference        |          | Reference        |          |
| Papillary                              | 153 (6.0)   | 0.47 (0.29–0.74) |          | 0.27 (0.22–0.61) |          |
| Chromophobe                            | 145 (3.9)   | 0.32 (0.19–0.54) |          | 0.29 (0.16–0.53) |          |
| Others                                 | 122 (3.3)   | 4.12 (2.77–6.11) |          | 4.48 (2.85–7.05) |          |
| Facility Type                          |             |                  | 0.001    |                  | 0.10     |
| Comprehensive Community Cancer Program | 1374 (39.7) | Reference        |          | Reference        |          |
| Community Cancer Program               | 363 (10.5)  | 1.24 (0.97–1.60) |          | 1.35 (0.97–1.88) |          |
| Integrated Network Cancer Program      | 131 (3.8)   | 0.88 (0.58–1.33) |          | 0.90 (0.51–1.59) |          |
| Academic/Research Program              | 1590 (46.0) | 1.36 (1.16–1.60) |          | 1.26 (1.02–1.56) |          |
| Insurance Type                         |             |                  | <0.001   |                  | 0.14     |
| Private                                | 1269 (33.9) | Reference        |          | Reference        |          |
| Public (Medicare/Medicaid/Others)      | 1900 (50.7) | 1.41 (1.20–1.66) |          | 1.10 (0.88–1.38) |          |
| Not insured                            | 459 (12.3)  | 1.91 (1.52–2.40) |          | 1.49 (1.06–2.10) |          |
| Not known                              | 117 (3.1)   | 1.51 (1.01–2.27) |          | 1.32 (0.68–2.57) |          |
| Metro, urban vs. rural area            |             |                  | 0.33     |                  |          |
| Metro                                  | 3411 (93.1) | Reference        |          |                  |          |
| Urban                                  | 235 (6.3)   | 0.82 (0.60–1.10) |          |                  |          |
| Rural                                  | 17 (0.5)    | 1.43 (0.50–4.13) |          |                  |          |
| Great Circle Distance                  | 23.9 (71.2) | 1.00 (0.99–1.01) | 0.78     |                  |          |
| Median Income                          |             |                  | 0.01     |                  | 0.06     |
| <\$38,000                              | 888 (23.9)  | Reference        |          | Reference        |          |
| \$38,000–\$47,999                      | 963 (25.9)  | 1.04 (0.86–1.27) |          | 1.30 (0.99–1.69) |          |
| \$48,000–62,999                        | 1112 (29.9) | 0.82 (0.68–0.99) |          | 0.98 (0.74–1.29) |          |
| \$63,000+                              | 758 (20.4)  | 0.80 (0.64–0.98) |          | 1.33 (0.92–1.92) |          |
| % no high school degree                |             |                  | <0.001   |                  | 0.01     |
| ≥21%                                   | 2137 (57.4) | References       |          | Reference        |          |
| 13.0–20.9%                             | 735 (19.7)  | 0.80 (0.67–0.97) |          | 0.82 (0.63–1.07) |          |
| 7.0–12.9%                              | 565 (15.2)  | 0.64 (0.52–0.80) |          | 0.58 (0.42–0.82) |          |
| <7.0%                                  | 285 (7.7)   | 0.65 (0.49–0.87) |          | 0.59 (0.37–0.94) |          |
| Charlson/Deyo Score                    |             |                  | 0.33     |                  |          |
| 0                                      | 2798 (74.7) | Reference        |          |                  |          |
| 1                                      | 697 (18.6)  | 0.88 (0.73–1.06) |          |                  |          |
| 2                                      | 250 (6.7)   | 0.90 (0.67–1.19) |          |                  |          |
| Diagnosis Year                         |             |                  | 0.10     |                  | 0.27     |
| 2004–2006                              | 608 (16.2)  | Reference        |          | Reference        |          |
| 2007–2009                              | 910 (24.3)  | 0.89 (0.71–1.12) |          | 0.87 (0.63–1.19) |          |
| 2010–2012                              | 1100 (29.4) | 0.77 (0.62–0.96) |          | 0.76 (0.56–1.03) |          |

2013–2015

1127 (30.1)

0.82 (0.66–1.02)

0.92 (0.68–1.24)

**Table S5.** Factors associated with advanced-stage in American Indians/Alaskan Natives in ACR ( $n = 632$ ).

| Characteristics                 | Unadjusted   |                  |          | Adjusted          |          |
|---------------------------------|--------------|------------------|----------|-------------------|----------|
|                                 | <i>n</i> (%) | OR (95% C.I.)    | <i>p</i> | OR (95% C.I.)     | <i>p</i> |
| Age                             |              |                  | 0.10     |                   | 0.06     |
| 20–49                           | 146 (23.1)   | Reference        |          | Reference         |          |
| 50–65                           | 297 (47.1)   | 1.60 (0.99–2.27) |          | 2.08 (1.14–3.79)  |          |
| 66–79                           | 151 (23.9)   | 0.96 (0.54–1.71) |          | 1.07 (0.50–2.28)  |          |
| 80+                             | 37 (5.9)     | 1.55 (0.65–3.69) |          | 1.69 (0.37–7.70)  |          |
| Gender                          |              |                  | 0.009    |                   | 0.03     |
| Male                            | 401 (63.4)   | Reference        |          | Reference         |          |
| Female                          | 231 (36.6)   | 0.58 (0.39–0.87) |          | 0.55 (0.32–0.95)  |          |
| Histologic Subtype              |              |                  | <0.001   |                   | <0.001   |
| Clear Cell                      | 377 (88.7)   | Reference        |          | Reference         |          |
| Papillary                       | 22 (5.2)     | 1.20 (0.44–3.27) |          | 1.26 (0.43–3.69)  |          |
| Chromophobe                     | 8 (1.9)      | 0.44 (0.05–2.66) |          | 0.52 (0.06–4.64)  |          |
| Others                          | 18 (4.2)     | 2.61 (0.89–7.66) |          | 3.73 (1.12–12.48) |          |
| Marital Status                  |              |                  | 0.27     |                   |          |
| Married                         | 283 (44.8)   | Reference        |          |                   |          |
| Single                          | 181 (28.6)   | 0.87 (0.56–1.35) |          |                   |          |
| Separated/divorced/widowed      | 107 (16.9)   | 0.78 (0.46–1.32) |          |                   |          |
| Not known                       | 61 (9.7)     | 0.47 (0.22–1.03) |          |                   |          |
| % Native language               |              |                  | 0.84     |                   |          |
| <4%                             | 242 (38.3)   | Reference        |          |                   |          |
| ≥4%                             | 388 (61.4)   | 0.96 (0.66–1.41) |          |                   |          |
| RUCC 2013                       |              |                  | 0.52     |                   |          |
| 1 or 2                          | 304 (48.1)   | Reference        |          |                   |          |
| 3–7                             | 327 (51.7)   | 1.13 (0.78–1.64) |          |                   |          |
| % high school degree graduation |              |                  | 0.77     |                   | 0.04     |
| ≥70%                            | 215 (34.0)   | Reference        |          |                   |          |
| <70%                            | 415 (65.7)   | 1.14 (0.76–1.69) |          | 2.73 (1.04–7.17)  |          |
| % unemployment                  |              |                  | 0.96     |                   |          |
| <5%                             | 140 (22.2)   | References       |          |                   |          |
| ≥5, <10%                        | 147 (23.3)   | 1.07 (0.62–1.86) |          |                   |          |
| ≥10%                            | 343 (54.3)   | 1.06 (0.66–1.70) |          |                   |          |
| % Poverty Rate                  |              |                  | 0.10     |                   | 0.08     |
| <10%                            | 103 (16.3)   | Reference        |          | Reference         |          |
| ≥10, <20%                       | 113 (17.9)   | 1.65 (0.88–3.09) |          | 0.98 (0.41–2.35)  |          |
| ≥20%                            | 414 (65.5)   | 0.94 (0.58–1.65) |          | 0.37 (0.12–1.15)  |          |
| Diagnosis Year                  |              |                  | 0.09     |                   | 0.048    |
| 2007–2008                       | 108 (17.1)   | Reference        |          | Reference         |          |
| 2009–2010                       | 121 (19.1)   | 1.25 (0.67–2.32) |          | 1.73 (0.73–4.12)  |          |
| 2011–2012                       | 134 (21.2)   | 0.86 (0.52–1.79) |          | 1.09 (0.46–2.60)  |          |
| 2013–2014                       | 121 (19.1)   | 1.96 (1.08–3.56) |          | 2.89 (1.28–6.49)  |          |
| 2015–2016                       | 148 (23.4)   | 1.40 (0.72–2.69) |          | 1.90 (0.80–4.48)  |          |

**Table S6.** Factors associated with advanced-stage diagnosis in Mexican Americans in ACR ( $n = 739$ ).

| Characteristics            | Unadjusted  |                  | Adjusted |                   |          |
|----------------------------|-------------|------------------|----------|-------------------|----------|
|                            | <i>n</i>    | OR (95% C.I.)    | <i>p</i> | OR (95% C.I.)     | <i>p</i> |
| Age                        |             |                  | 0.95     |                   | 0.69     |
| 20–49                      | 139 (18.9)  | Reference        |          | Reference         |          |
| 50–65                      | 295 (40.1)  | 1.14 (0.73–1.78) |          | 1.15 (0.55–2.39)  |          |
| 66–79                      | 239 (32.5)  | 1.11 (0.69–1.77) |          | 1.13 (0.53–2.44)  |          |
| 80+                        | 62 (8.4)    | 1.03 (0.49–2.17) |          | 2.20 (0.60–8.07)  |          |
| Gender                     |             |                  | 0.006    |                   | 0.054    |
| Male                       | 464 (62.8)  | Reference        |          | Reference         |          |
| Female                     | 275 (37.2)  | 0.62 (0.44–0.87) |          | 0.56 (0.32–1.01)  |          |
| Country of Origin          |             |                  | 0.84     |                   | 0.47     |
| U.S.-Born                  | 335 (58.5)  | Reference        |          | Reference         |          |
| Mexico-Born                | 238 (41.5)  | 0.84 (0.58–1.22) |          | 0.83 (0.49–1.41)  |          |
| Histologic Subtype         |             |                  | 0.37     |                   | 0.19     |
| Clear Cell                 | 363 (82.5)  | Reference        |          | Reference         |          |
| Papillary                  | 30 (6.8)    | 1.11 (0.49–2.54) |          | 1.14 (0.45–2.86)  |          |
| Chromophobe                | 25 (5.7)    | 1.53 (0.50–4.66) |          | 1.84 (0.36–9.51)  |          |
| Others                     | 22 (5.0)    | 2.23 (0.85–5.81) |          | 3.12 (1.08–9.06)  |          |
| Marital Status             |             |                  | 0.23     |                   | 0.06     |
| Married                    | 390 (52.8)  | Reference        |          | Reference         |          |
| Single                     | 147 (19.9)  | 0.97 (0.63–1.48) |          | 0.84 (0.42–1.72)  |          |
| Separated/divorced/widowed | 166 (22.5)  | 0.76 (0.50–1.14) |          | 0.51 (0.26–1.02)  |          |
| Not known                  | 36 (4.6)    | 1.93 (0.78–4.79) |          | 3.83 (0.81–18.18) |          |
| % Spanish language         |             |                  | 0.80     |                   |          |
| <10%                       | 297 (17.1)  | Reference        |          |                   |          |
| ≥10, <25%                  | 448 (28.0)  | 0.86 (0.60–1.24) |          |                   |          |
| ≥25, <50%                  | 393 (22.6)  | 0.88 (0.61–1.27) |          |                   |          |
| ≥50%                       | 561 (32.3)  | 0.98 (0.69–1.38) |          |                   |          |
| RUCC 2013                  |             |                  | 0.03     |                   | 0.50     |
| 1 or 2                     | 1332 (76.6) | Reference        |          | Reference         |          |
| 3–7                        | 407 (23.4)  | 1.36 (1.04–1.79) |          | 1.22 (0.68–2.21)  |          |
| % no high school degree    |             |                  | 0.83     |                   |          |
| ≥90%                       | 238 (13.7)  | Reference        |          |                   |          |
| ≥70, <90%                  | 725 (41.7)  | 1.05 (0.73–1.52) |          |                   |          |
| <70%                       | 776 (44.6)  | 0.97 (0.68–1.40) |          |                   |          |
| % unemployment             |             |                  | 0.40     |                   |          |
| <5%                        | 587 (33.8)  | References       |          |                   |          |
| ≥5%, <10%                  | 821 (47.2)  | 1.10 (0.84–1.43) |          |                   |          |
| ≥10%                       | 331 (19.0)  | 1.26 (0.90–1.75) |          |                   |          |
| % Poverty Rate             |             |                  | 0.12     |                   | 0.61     |
| <10%                       | 473 (27.2)  | Reference        |          | Reference         |          |
| ≥10%, <20%                 | 580 (33.4)  | 1.38 (1.02–1.88) |          | 0.81 (0.42–1.54)  |          |
| ≥20%                       | 686 (39.4)  | 1.19 (0.88–1.60) |          | 0.71 (0.38–1.38)  |          |
| Diagnosis Year             |             |                  | 0.01     |                   | 0.003    |
| 2007–2008                  | 315 (18.1)  | Reference        |          | Reference         |          |
| 2009–2010                  | 344 (19.8)  | 1.17 (0.81–1.71) |          | 1.08 (0.47–2.50)  |          |
| 2011–2012                  | 359 (20.6)  | 0.99 (0.68–1.45) |          | 1.15 (0.50–2.64)  |          |
| 2013–2014                  | 335 (19.3)  | 1.24 (0.85–1.80) |          | 2.70 (1.17–6.27)  |          |
| 2015–2016                  | 387 (22.2)  | 1.74 (1.17–2.61) |          | 3.97 (1.62–9.73)  |          |

**Table S7.** Cox Regression analysis for all-cause mortality in NCDB stratified based on TNM stage (early vs. late).

| Race/Ethnicity                | Unadjusted       |        | Adjusted Model 1 |        | Adjusted Model 2 |        |
|-------------------------------|------------------|--------|------------------|--------|------------------|--------|
|                               | HR (95%CI)       | P      | HR (95%CI)       | p      | HR (95%CI)       | p      |
| NHW vs. Other Groups          |                  |        |                  |        |                  |        |
| Early-Stage                   |                  |        |                  |        |                  |        |
| Non-Hispanic White            | Reference        |        | Reference        |        | Reference        |        |
| American Indian/Alaska Native | 1.01 (0.88–1.17) | 0.57   | 1.13 (0.92–1.38) | 0.25   | 1.04 (0.84–1.27) | 0.74   |
| Non-Hispanic Black            | 1.12 (1.09–1.15) | <0.001 | 1.12 (1.13–1.23) | <0.001 | 1.09 (1.04–1.13) | <0.001 |
| Asian American                | 0.67 (0.61–0.73) | <0.001 | 0.72 (0.64–0.82) | <0.001 | 0.76 (0.67–0.86) | <0.001 |
| Hispanic American             | 0.85 (0.82–0.87) | <0.001 | 0.90 (0.86–0.94) | <0.001 | 0.87 (0.84–0.91) | <0.001 |
| Late-Stage                    |                  |        |                  |        |                  |        |
| Non-Hispanic White            | Reference        |        | Reference        |        | Reference        |        |
| American Indian/Alaska Native | 1.07 (0.95–1.20) | 0.29   | 1.07 (0.87–1.32) | 0.52   | 1.01 (0.81–1.26) | 0.93   |
| Non-Hispanic Black            | 1.22 (1.18–1.25) | <0.001 | 1.09 (1.04–1.16) | 0.002  | 1.06 (0.99–1.12) | 0.06   |
| Asian American                | 0.94 (0.88–1.01) | 0.10   | 0.94 (0.87–1.32) | 0.25   | 0.97 (0.87–1.09) | 0.61   |
| Hispanic American             | 0.95 (0.92–0.97) | <0.001 | 0.97 (0.93–1.01) | 0.12   | 0.96 (0.91–0.99) | 0.04   |
| NHW vs. Hispanic American     |                  |        |                  |        |                  |        |
| Early Stage                   |                  |        |                  |        |                  |        |
| Non-Hispanic White            | Reference        |        | Reference        |        | Reference        |        |
| Mexican/Chicano               | 0.80 (0.72–0.90) | <0.001 | 0.95 (0.82–1.11) | 0.53   | 0.89 (0.77–1.04) | 0.14   |
| Puerto Rican                  | 0.67 (0.53–0.85) | 0.001  | 0.61 (0.42–0.87) | 0.007  | 0.56 (0.39–0.81) | 0.002  |
| Cuban                         | 0.83 (0.67–1.03) | 0.10   | 0.81 (0.60–1.10) | 0.17   | 0.75 (0.56–1.02) | 0.07   |
| South or Central American     | 0.56 (0.46–0.69) | <0.001 | 0.71 (0.53–0.94) | 0.02   | 0.70 (0.53–0.93) | 0.01   |
| Dominican                     | 0.74 (0.49–1.12) | 0.15   | 0.83 (0.46–1.50) | 0.53   | 0.77 (0.43–1.40) | 0.39   |
| Late Stage                    |                  |        |                  |        |                  |        |
| Non-Hispanic White            | Reference        |        | Reference        |        | Reference        |        |
| Mexican/Chicano               | 0.95 (0.87–1.03) | 0.19   | 0.94 (0.82–1.08) | 0.37   | 0.90 (0.78–1.04) | 0.16   |
| Puerto Rican                  | 0.95 (0.79–1.15) | 0.61   | 1.09 (0.79–1.50) | 0.60   | 1.07 (0.77–1.48) | 0.69   |
| Cuban                         | 1.33 (1.14–1.55) | <0.001 | 1.22 (0.95–1.56) | 0.12   | 1.16 (0.91–1.50) | 0.23   |
| South or Central American     | 0.67 (0.57–0.79) | <0.001 | 0.76 (0.58–1.01) | 0.054  | 0.75 (0.57–0.99) | 0.047  |
| Dominican                     | 0.81 (0.58–1.14) | 0.22   | 0.94 (0.56–1.59) | 0.81   | 0.89 (0.53–1.51) | 0.67   |

Model 1: adjusted for age category, gender, RCC histologic subtype, grade (1 and 2 vs. 3 and 4), facility type, insurance type, Charlson/Deyo Score, and year of diagnosis. Model 2: adjusted for age category, gender, RCC histologic subtype, grade (1 and 2 vs. 3 and 4), facility type, insurance type, great circle distance, neighborhood characteristics (median income and % high school graduation), Charlson/Deyo Score, and year of diagnosis. Unadjusted model included all RCC histologic subtypes even if subtype was not specified (NOS), while adjusted model excluded NOS RCC subtype.

**Table S8.** Cox Regression analysis for all-cause mortality in ACR stratified based on TNM stage (early vs. late).

| Race/Ethnicity                                  | Unadjusted       |        | Adjusted Model 1 |        | Adjusted Model 2 |        |
|-------------------------------------------------|------------------|--------|------------------|--------|------------------|--------|
|                                                 | HR (95%CI)       | P      | HR (95%CI)       | p      | HR (95%CI)       | p      |
| NHW vs. Other Groups                            |                  |        |                  |        |                  |        |
| Early-Stage                                     |                  |        |                  |        |                  |        |
| Non-Hispanic White                              | Reference        |        | Reference        |        | Reference        |        |
| American Indian/Alaska Native                   | 1.36 (1.10–1.67) | 0.004  | 1.74 (1.29–2.36) | <0.001 | 1.33 (0.94–1.89) | 0.11   |
| Hispanic American                               | 1.05 (0.90–1.22) | 0.57   | 1.23 (0.99–1.52) | 0.06   | 1.01 (0.80–1.27) | 0.96   |
| Late-Stage                                      |                  |        |                  |        |                  |        |
| Non-Hispanic White                              | Reference        |        | Reference        |        | Reference        |        |
| American Indian/Alaska Native                   | 1.14 (0.93–1.39) | 0.22   | 1.51 (1.12–1.84) | 0.03   | 1.29 (0.84–1.96) | 0.24   |
| Hispanic American                               | 1.17 (1.02–1.34) | 0.03   | 1.43 (1.12–1.83) | 0.005  | 1.33 (1.02–1.74) | 0.04   |
| NHW vs. Mexican American                        |                  |        |                  |        |                  |        |
| 34                                              |                  |        |                  |        |                  |        |
| Early-Stage                                     |                  |        |                  |        |                  |        |
| Non-Hispanic White                              | Reference        |        | Reference        |        | Reference        |        |
| Mexican American                                | 2.65 (2.24–3.13) | <0.001 | 2.78 (2.20–3.51) | <0.001 | 2.25 (1.72–2.94) | <0.001 |
| Late-Stage                                      |                  |        |                  |        |                  |        |
| Non-Hispanic White                              | Reference        |        | Reference        |        | Reference        |        |
| Mexican American                                | 1.72 (1.49–1.99) | <0.001 | 2.53 (1.94–3.31) | <0.001 | 2.19 (1.64–2.93) | <0.001 |
| NHW vs. U.S.- and Foreign-Born Mexican American |                  |        |                  |        |                  |        |
| Early-Stage                                     |                  |        |                  |        |                  |        |
| Non-Hispanic White                              | Reference        |        | Reference        |        | Reference        |        |
| U.S.-Born Mexican American                      | 3.68 (3.02–4.48) | <0.001 | 3.62 (2.77–4.72) | <0.001 | 3.07 (2.27–4.14) | <0.001 |
| Foreign-Born Mexican American                   | 1.67 (1.18–2.36) | 0.004  | 1.54 (0.93–2.55) | 0.09   | 1.23 (0.73–2.09) | 0.44   |
| Late-Stage                                      |                  |        |                  |        |                  |        |
| Non-Hispanic White                              | Reference        |        | Reference        |        | Reference        |        |
| U.S.-Born Mexican American                      | 2.01 (1.67–2.43) | <0.001 | 3.13 (2.21–4.44) | <0.001 | 2.76 (1.92–3.97) | <0.001 |
| Foreign-Born Mexican American                   | 1.38 (1.09–1.77) | 0.01   | 2.04 (1.35–3.06) | 0.001  | 1.67 (1.08–2.58) | 0.02   |

Model 1: Adjusted for age category, gender, marital status, RCC subtypes (excluding NOS), grade (1/2 vs. 3/4), and diagnosis year (categorical). Model 2: Adjusted for age category, gender, marital status, RCC subtypes (excluding NOS), stage (I/II vs. III/IV), grade (1/2 vs. 3/4), diagnosis year (categorical), percent high school graduation rate ( $\geq 90\%$ , 70–90%, and  $< 70\%$ ), percent unemployment ( $< 5\%$ , 5–10%, and  $\geq 10\%$ ), and percent poverty ( $< 10\%$ , 10–20%, and  $\geq 20\%$ ). Unadjusted model included all RCC histologic subtypes even if subtype was not specified (NOS), while adjusted model excluded NOS RCC subtype.

**Table S9.** RCC-specific mortality in ACR stratified based on TNM stage (early vs. late).

| Race/ethnicity                                  | Unadjusted        |         | Adjusted Model 1 |         | Adjusted Model 2 |         |
|-------------------------------------------------|-------------------|---------|------------------|---------|------------------|---------|
|                                                 | HR (95%CI)        | P       | HR (95%CI)       | p       | HR (95%CI)       | p       |
| NHW vs. Other Groups                            |                   |         |                  |         |                  |         |
| Early-Stage                                     |                   |         |                  |         |                  |         |
| Non-Hispanic White                              | Reference         |         | Reference        |         | Reference        |         |
| American Indian/Alaska Native                   | 1.10 (0.62–1.97)  | 0.74    | 0.96 (0.47–1.94) | 0.96    | 1.01 (0.41–2.46) | 0.99    |
| Hispanic American                               | 1.01 (0.67–1.52)  | 0.98    | 0.97 (0.61–1.55) | 0.97    | 0.90 (0.57–1.43) | 0.66    |
| Late-Stage                                      |                   |         |                  |         |                  |         |
| Non-Hispanic White                              | Reference         |         | Reference        |         | Reference        |         |
| American Indian/Alaska Native                   | 1.04 (0.75–1.44)  | 0.80    | 1.21 (0.80–1.83) | 0.36    | 1.07 (0.66–1.73) | 0.80    |
| Hispanic American                               | 1.10 (0.87–1.40)  | 0.43    | 1.03 (0.74–1.42) | 0.87    | 1.00 (0.71–1.42) | 0.99    |
| NHW vs. Mexican American                        |                   |         |                  |         |                  |         |
| Early-Stage                                     |                   |         |                  |         |                  |         |
| Non-Hispanic White                              | Reference         |         | Reference        |         | Reference        |         |
| Mexican American                                | 2.63 (1.73–3.99)  | <0.0001 | 2.30 (1.44–3.67) | <0.001  | 2.08 (1.26–3.43) | <0.01   |
| Late-Stage                                      |                   |         |                  |         |                  |         |
| Non-Hispanic White                              | Reference         |         | Reference        |         | Reference        |         |
| Mexican American                                | 1.76 (1.38–2.24)  | <0.0001 | 1.71 (1.20–2.43) | <0.01   | 1.51 (1.04–2.18) | 0.03    |
| NHW vs. U.S.- and Foreign-Born Mexican American |                   |         |                  |         |                  |         |
| Early-Stage                                     |                   |         |                  |         |                  |         |
| Non-Hispanic White                              | Reference         |         | Reference        |         | Reference        |         |
| U.S.-Born Mexican American                      | 3.73 (2.37–5.87)  | <0.0001 | 3.03 (1.81–5.07) | <0.0001 | 2.84 (1.62–4.98) | <0.001  |
| Foreign-Born Mexican American                   | 0.32 (0.05, 2.33) | 0.26    | 0.34 (0.05–2.50) | 0.29    | 0.34 (0.05–2.55) | 0.30    |
| Late-Stage                                      |                   |         |                  |         |                  |         |
| Non-Hispanic White                              | Reference         |         | Reference        |         | Reference        |         |
| U.S.-Born Mexican American                      | 2.48 (1.87–3.28)  | <0.0001 | 2.69 (1.88–3.85) | <0.0001 | 2.43 (1.70–3.48) | <0.0001 |
| Foreign-Born Mexican American                   | 1.08 (0.68–1.73)  | 0.74    | 0.90 (0.45–1.79) | 0.76    | 0.74 (0.36–1.54) | 0.42    |

Model 1: Adjusted for age category, gender, marital status, RCC subtypes, stage (I/II vs. III/IV) grade (1/2 vs. 3/4), and diagnosis year (categorical). Model 2: Adjusted for age category, gender, marital status, RCC subtypes, stage (I/II vs. III/IV) grade (1/2 vs. 3/4), diagnosis year (categorical), percent high school graduation rate ( $\geq 90\%$ , 70–90%, and  $< 70\%$ ), percent unemployment ( $< 5\%$ , 5–10%, and  $\geq 10\%$ ), and percent poverty ( $< 10\%$ , 10–20%, and  $\geq 20\%$ ).
